# Supplementary material for: The Proinflammatory Role of ANGPTL8 R59W Variant in Modulating Inflammation through NF-κB Signaling Pathway under TNFα Stimulation
Source: MDPI journal article supplement (doi:10.3390/cells12212563), 2023-11-02

Supplementary-original gels

**Figure2B**

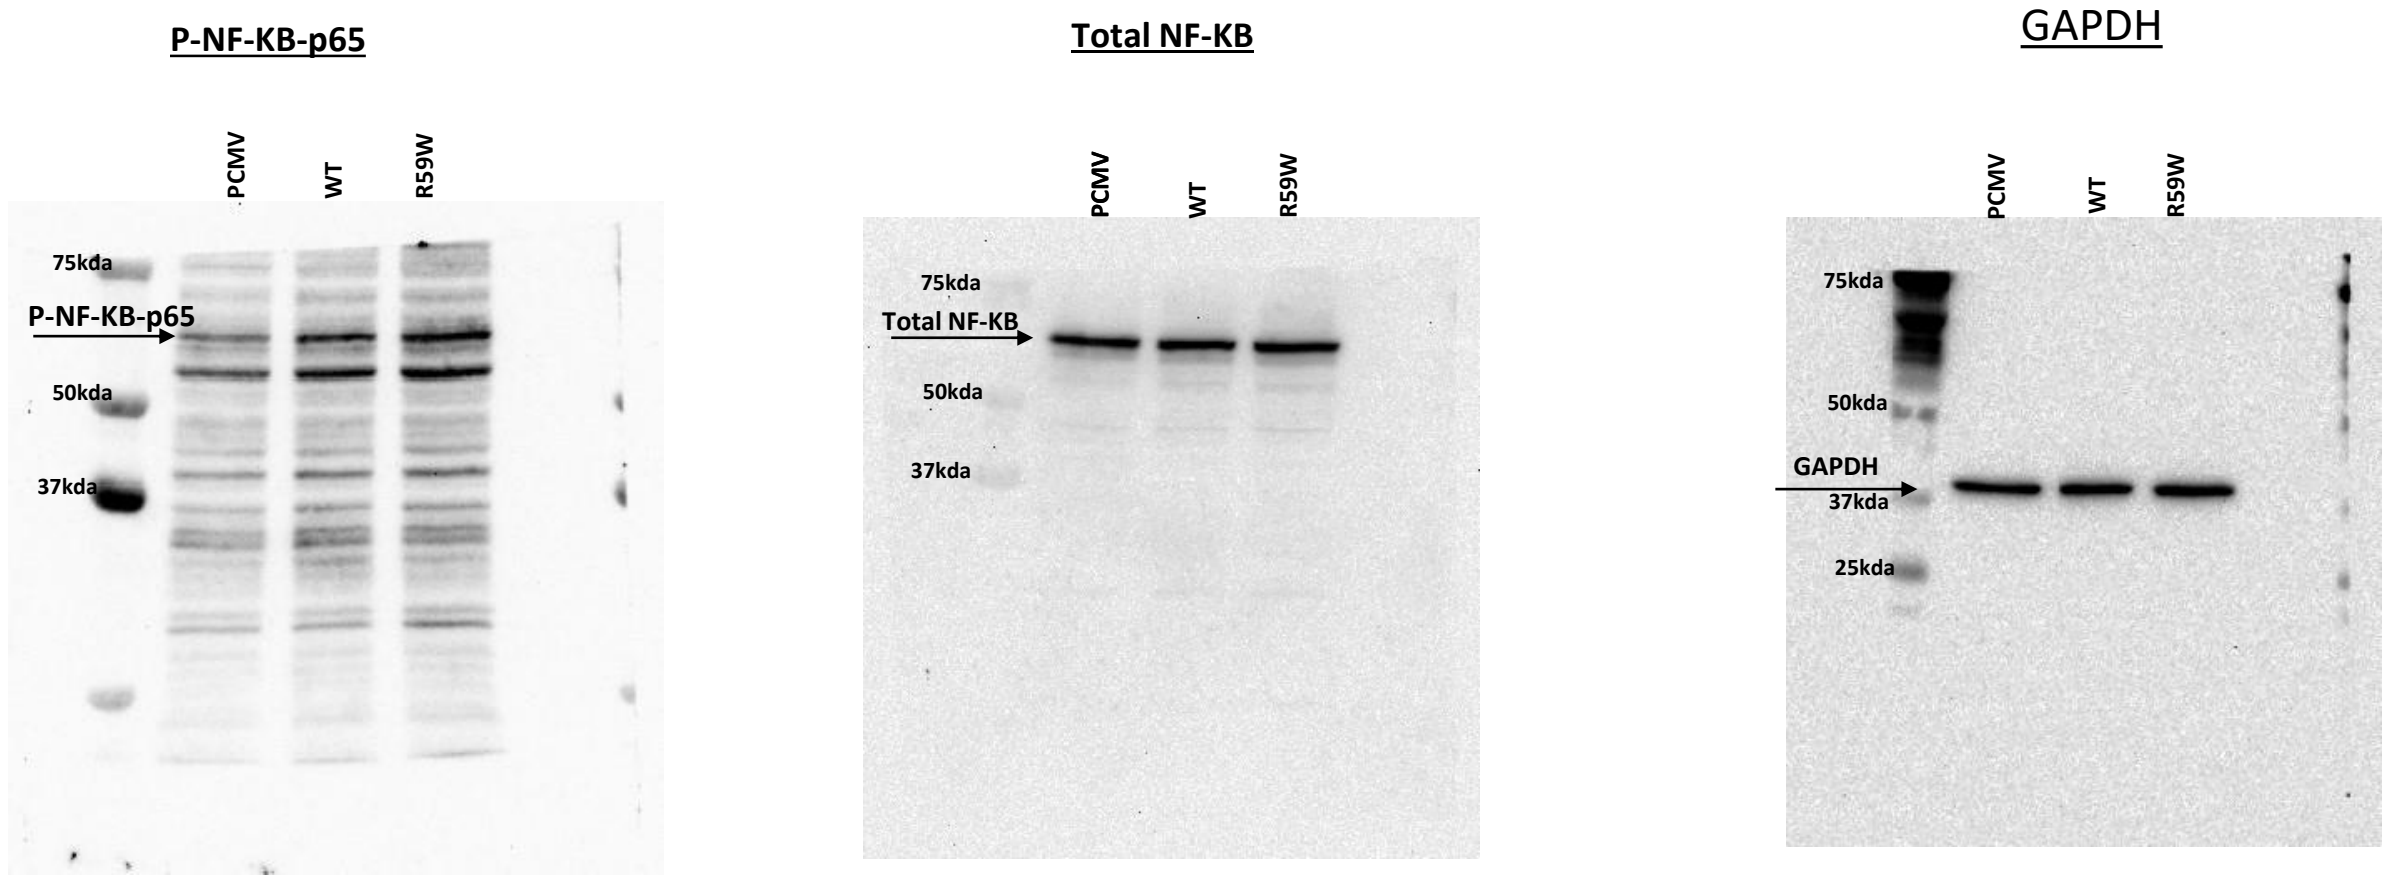

The blot above 75kda was cut and removed, the bottom half(below 75kda) was used for screening P-nf-KB

**FIGURE-2C**

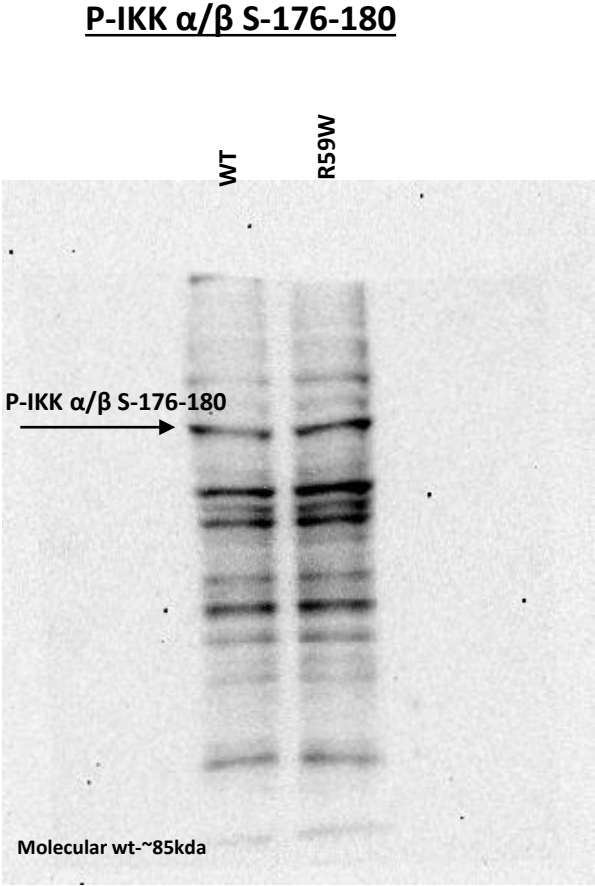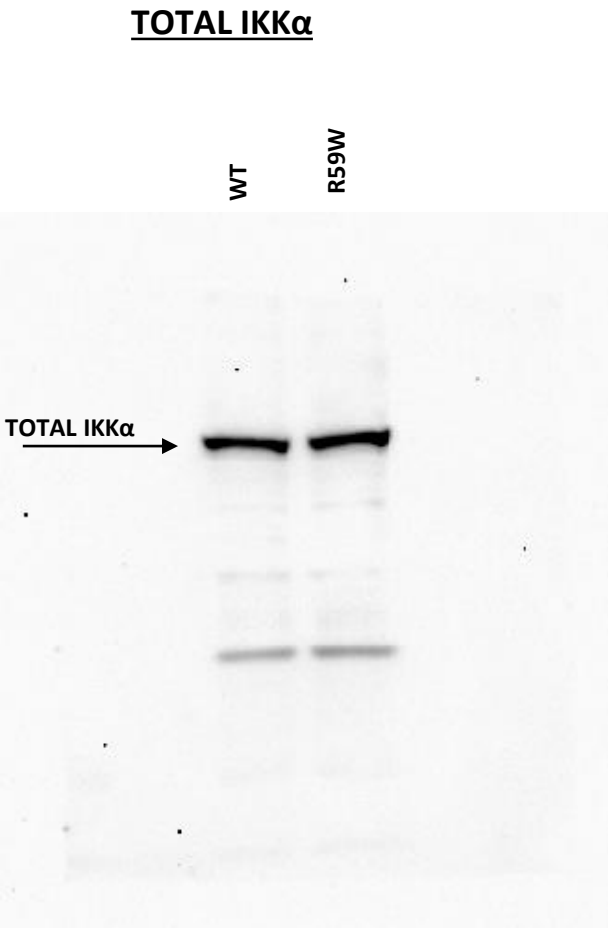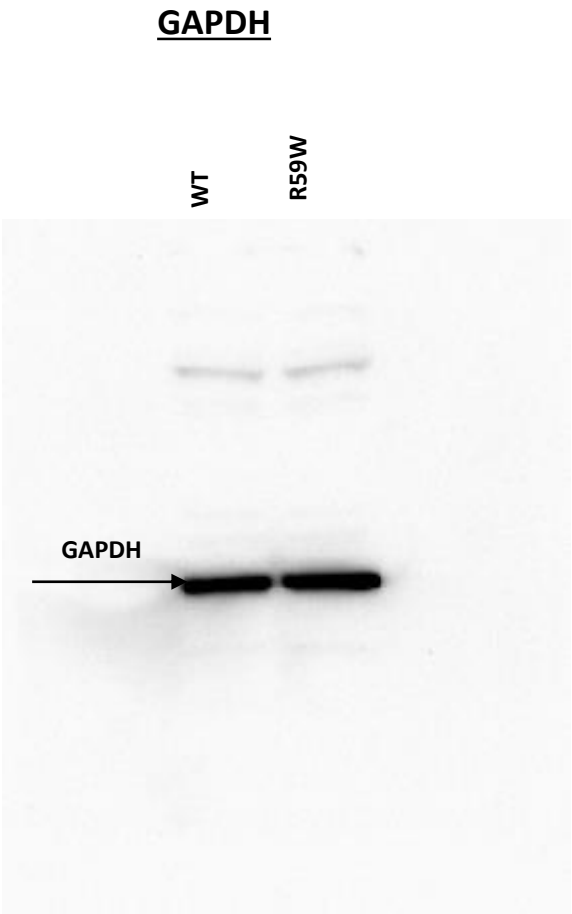

**Figure 2D**

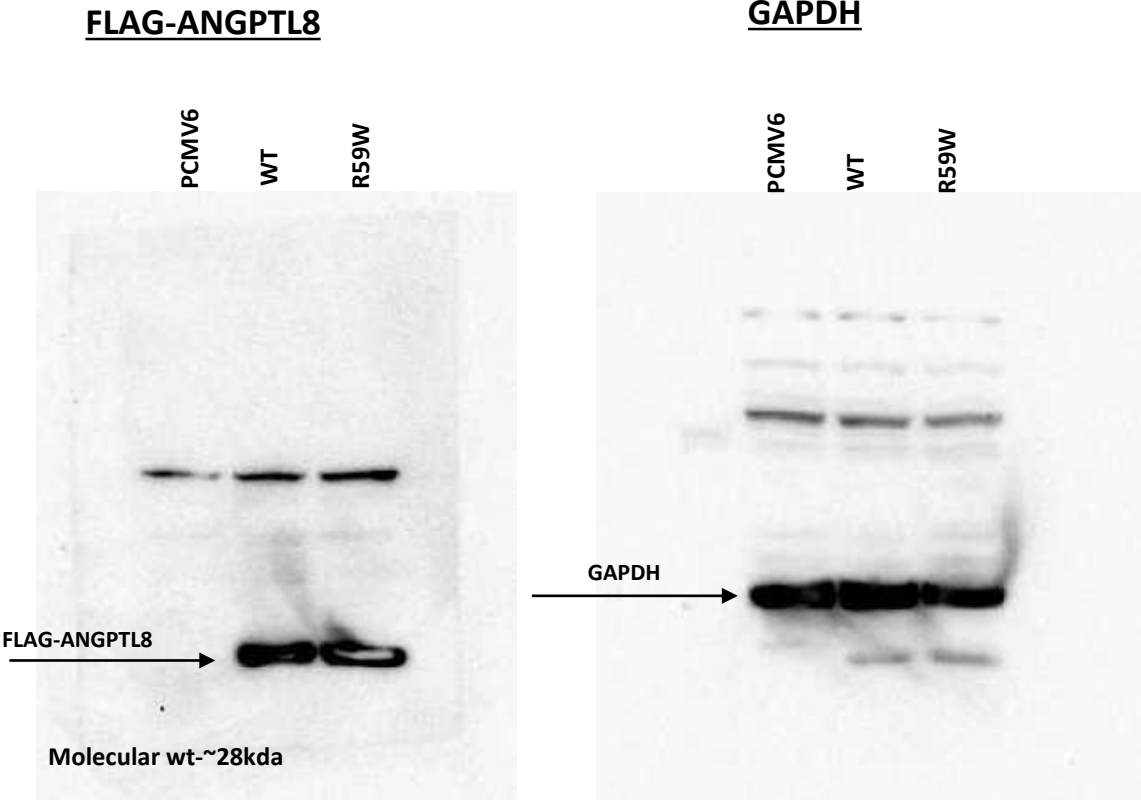

**FIGURE 3A**

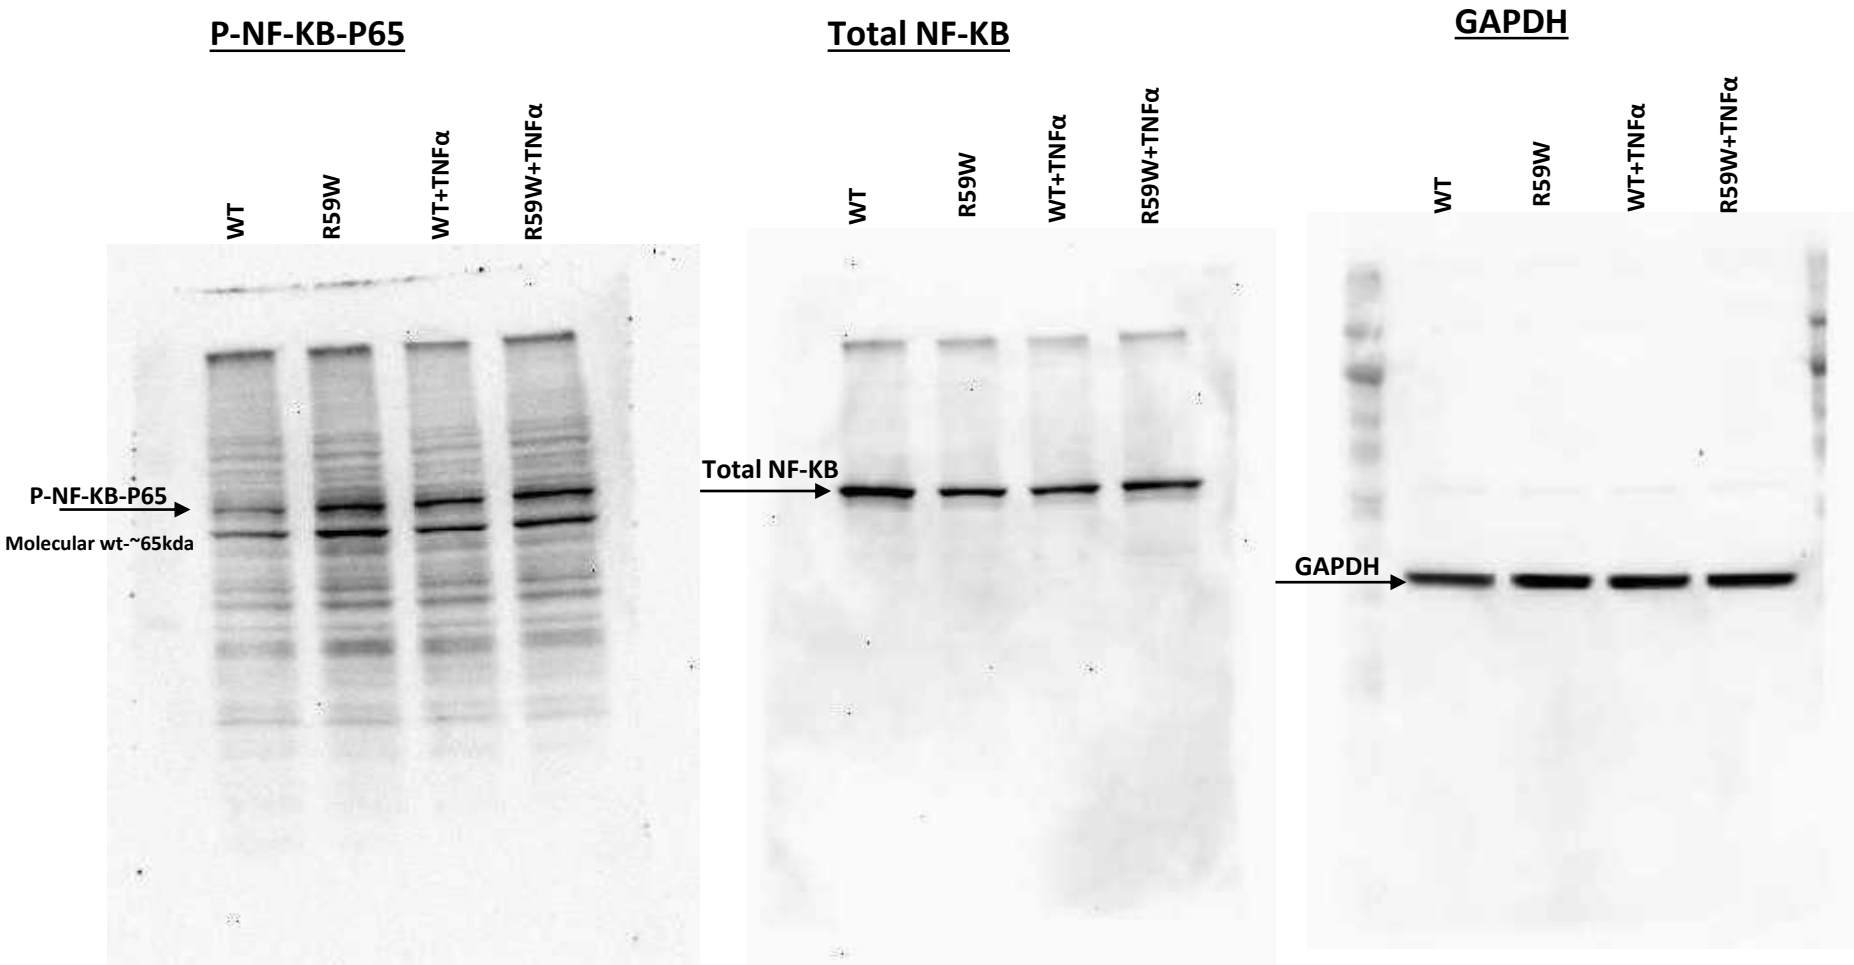

**FIGURE 3B**

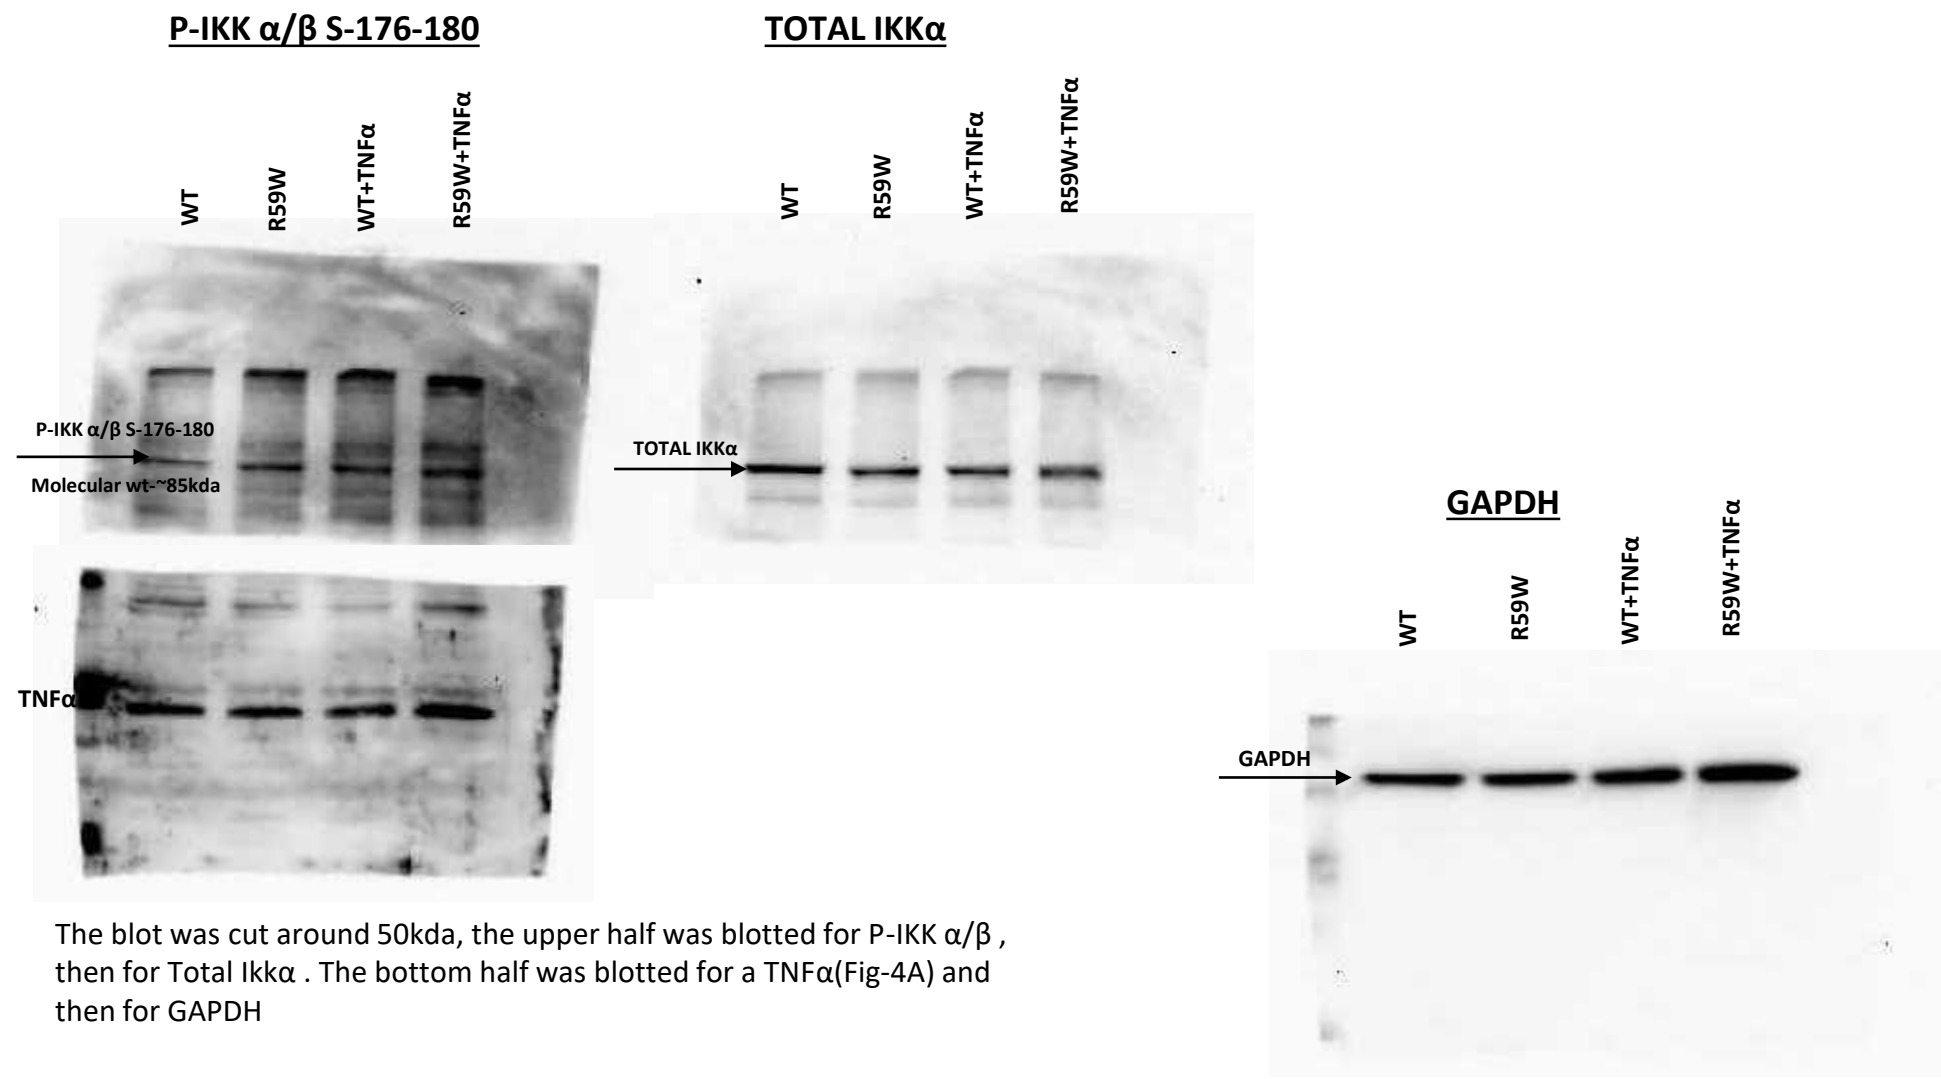

**FIGURE 3C**

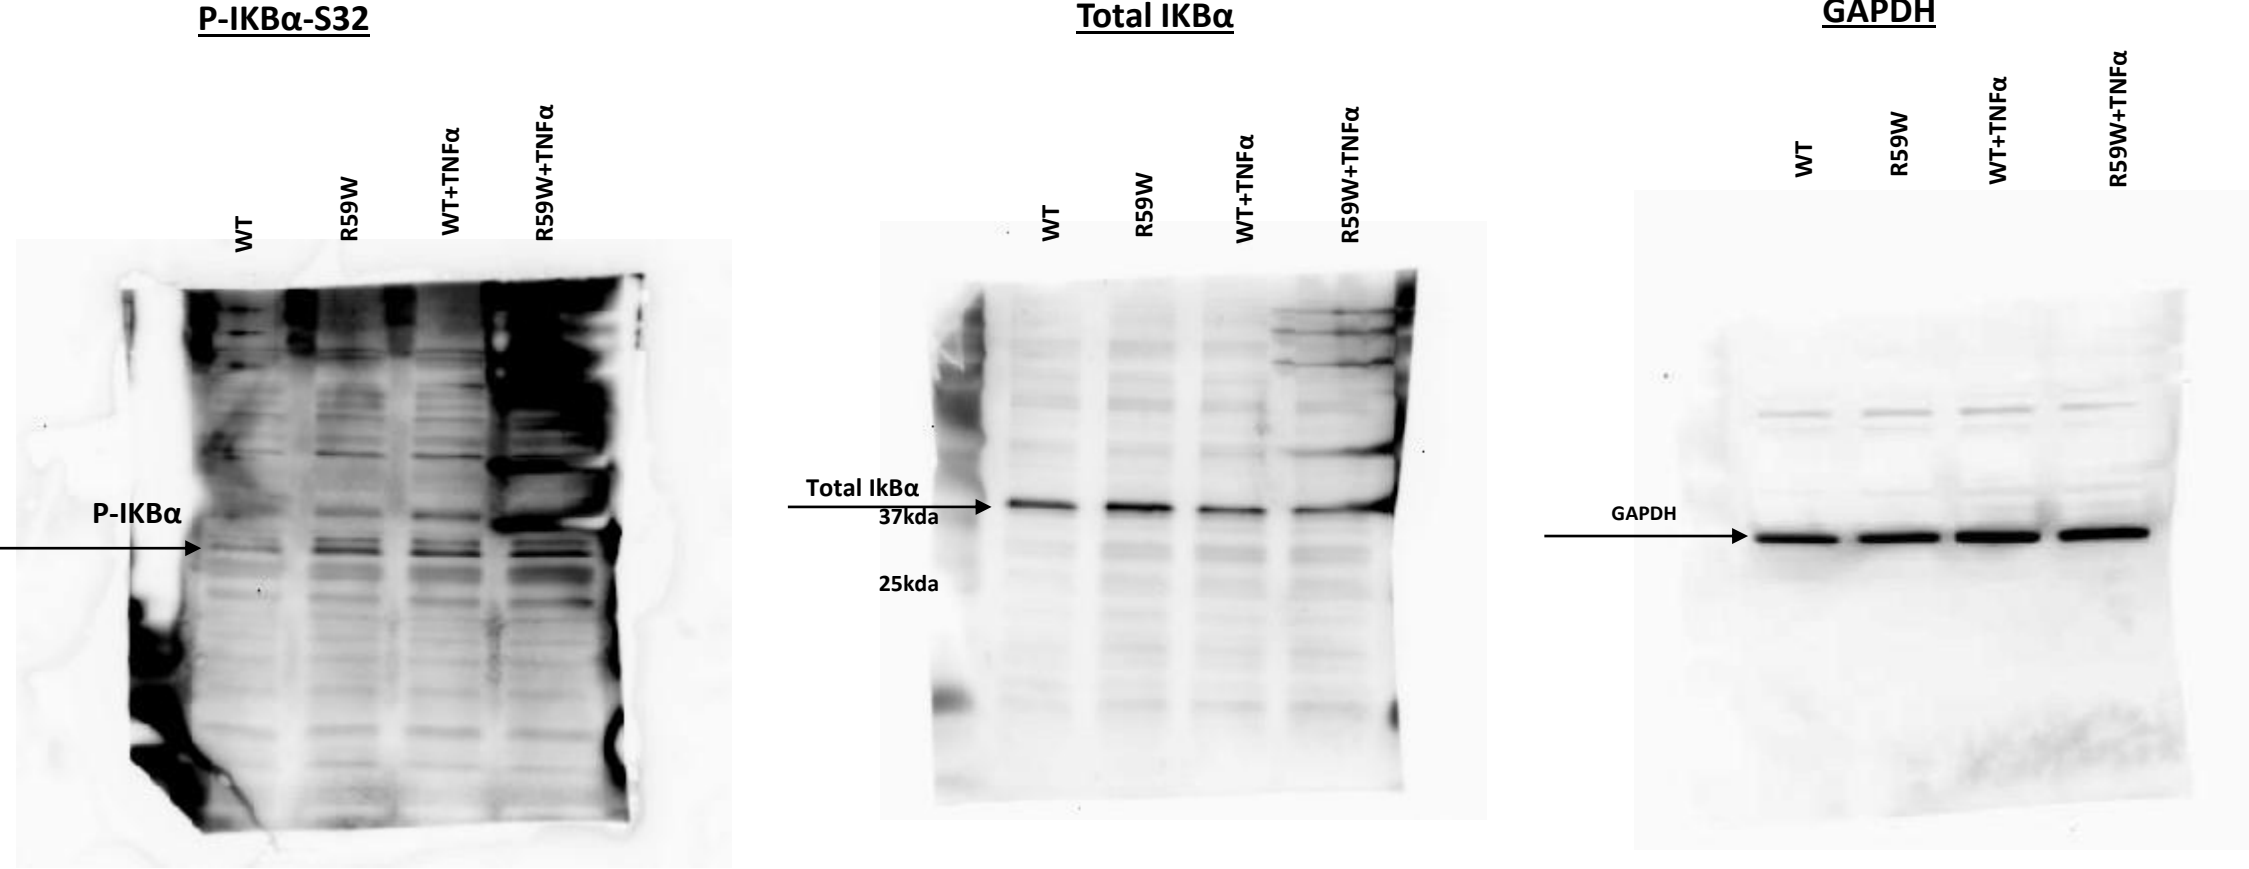

Figure 4A

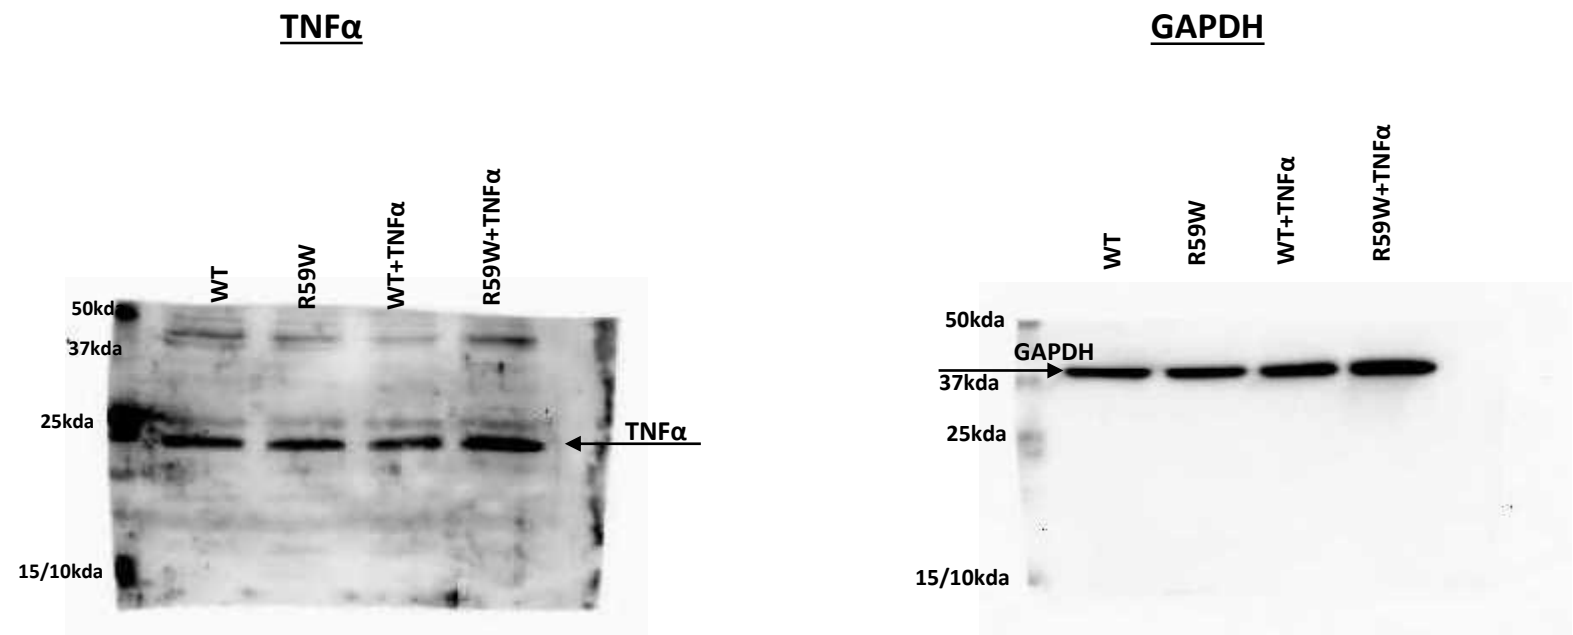

The blot was cut around 50kda, the upper half was blotted for P-IKK α/β(Fig3b) and the bottom half was blotted for a TNFα, then for GAPDH

Molecular wt-~24kda



**FIGURE 4-A**

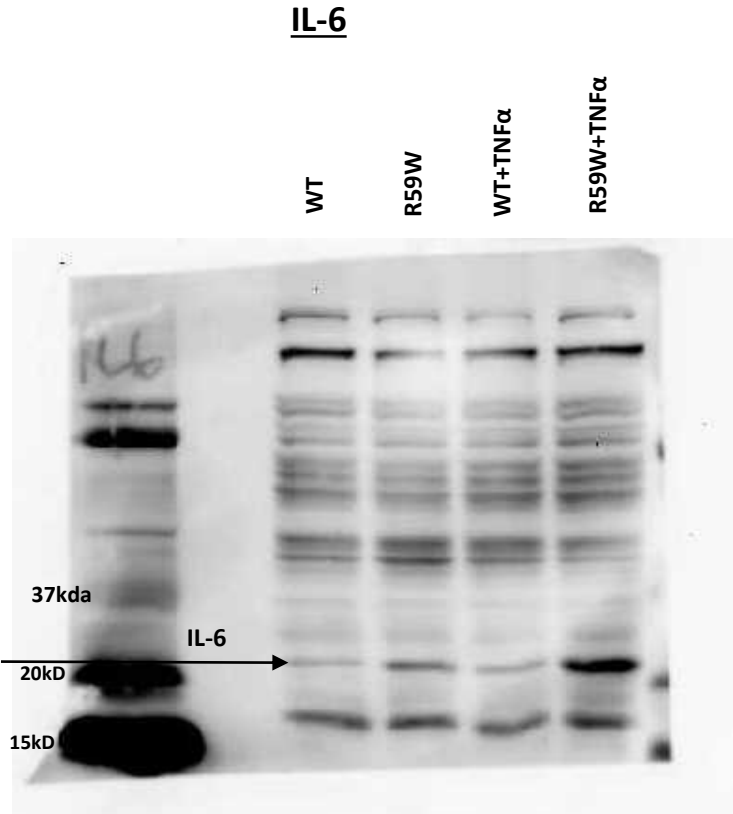

Molecular wt-~21kda

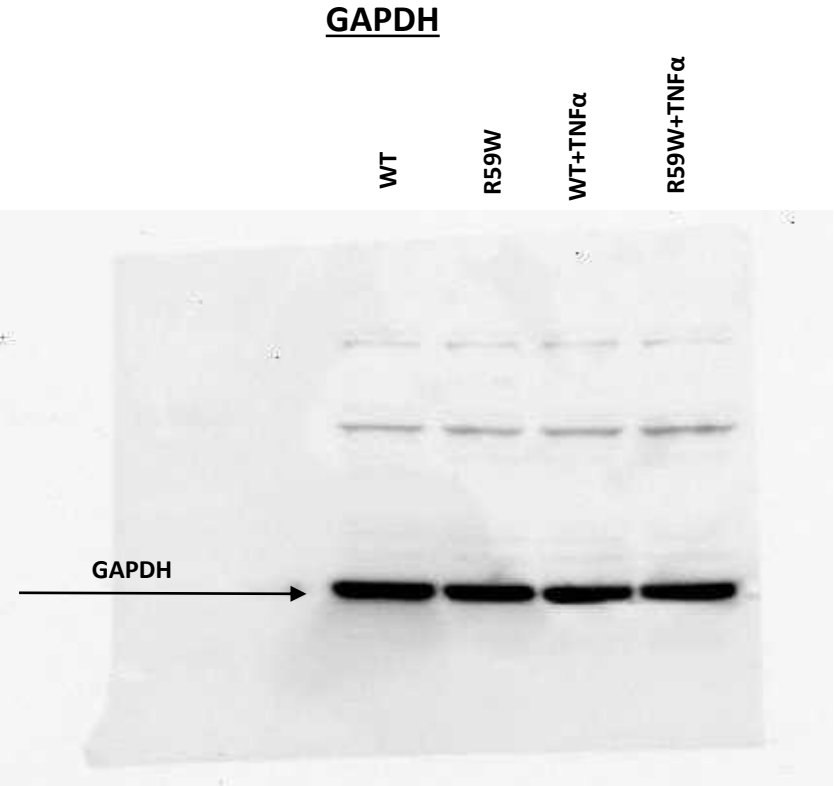

Supplement: s1 [file s1]
